# Supplementary material for: Purity matters: A workflow for the valid high-resolution lipid profiling of mitochondria from cell culture samples
Source: PubMed Central journal article supplement (PMC4759577; doi:10.1038/srep21107), 2016-02-19
Supplement: srep21107-s2.pdf [file srep21107-s2.pdf]

# Purity matters: A workflow for the valid high-resolution lipid profiling of mitochondria from cell culture samples

Lisa Kappler<sup>1,+</sup>, Jia Li<sup>2,+</sup>, Hans-Ulrich Häring<sup>1,3,4</sup>, Cora Weigert<sup>1,3,4</sup>, Rainer Lehmann<sup>1,3,4</sup>, Guowang Xu<sup>2,\*</sup>, Miriam Hoene<sup>1,\*</sup>

<sup>1</sup>Division of Clinical Chemistry and Pathobiochemistry, Department of Diagnostic Laboratory Medicine, University Hospital Tuebingen, Tuebingen, Germany

<sup>2</sup>Key Laboratory of Separation Science for Analytical Chemistry, Dalian Institute of Chemical Physics, Chinese Academy of Sciences, Dalian, China

<sup>3</sup>Department of Molecular Diabetology, Institute for Diabetes Research and Metabolic Diseases of the Helmholtz Centre Munich at the University of Tuebingen, Tuebingen, Germany

<sup>4</sup>German Center for Diabetes Research (DZD), Tuebingen, Germany

<sup>+</sup>Lisa Kappler and Jia Li contributed equally to this study.

<sup>\*</sup>Corresponding Authors.

## SUPPLEMENT

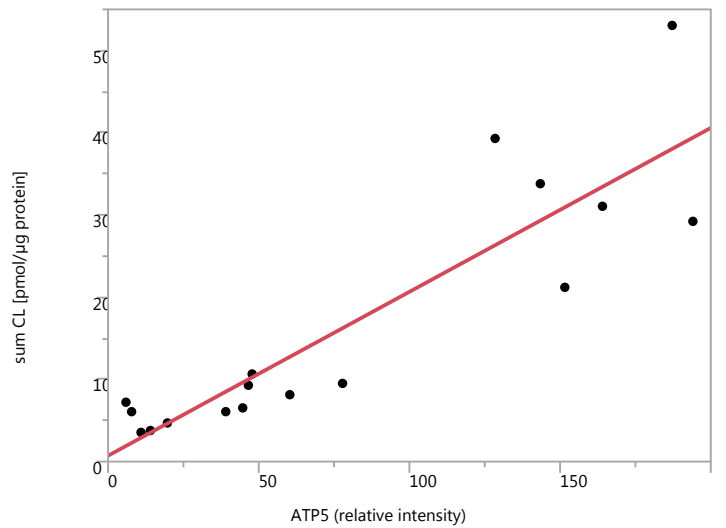

**Supplementary Figure 1:** Correlation of the sum of cardiolipins (CL) with the content of Mitochondrial ATP synthase 5 (ATP5) protein as determined by western blot analysis ( $r^2 = 0.79$ ,  $p < 0.0001$ ).
